# 1 **Disinhibition-assisted LTP in the prefrontal-amygdala pathway via** 2 **suppression of somatostatin-expressing interneurons**

3  
4 **Wataru Ito<sup>1,\*</sup>, Brendon Fusco<sup>1</sup>, and Alexei Morozov<sup>1,2,3,\*</sup>**  
5

6 <sup>1</sup>Virginia Tech Carilion Research Institute, Roanoke, Virginia, USA; <sup>2</sup>School of Biomedical Engineering and  
7 Sciences, Virginia Tech, Blacksburg, Virginia, USA; <sup>3</sup>Department of Psychiatry and Behavioral Medicine, Virginia  
8 Tech Carilion School of Medicine, Roanoke, Virginia, USA.  
9

10 **Abstract.** Natural brain adaptations often involve changes in synaptic strength. The artificial manipulations can help  
11 investigate the role of synaptic strength in a specific brain circuit not only in various physiological phenomena like  
12 correlated neuronal firing and oscillations but also in behaviors. High and low-frequency stimulation at presynaptic  
13 sites has been used widely to induce long-term potentiation (LTP) and depression (LTD), respectively. This approach  
14 is effective in many brain areas, but not in the basolateral amygdala (BLA), because the robust local GABAergic tone  
15 inside the BLA restricts synaptic plasticity. Here, we identified the subclass of GABAergic neurons that gate LTP in  
16 the BLA afferents from the dorsomedial prefrontal cortex (dmPFC). Chemogenetic suppression of somatostatin-  
17 positive interneurons (Sst-INs) enabled the *ex vivo* LTP by high-frequency stimulation of the afferent, but the  
18 suppression of parvalbumin-positive interneurons (PV-INs) did not. Moreover, optogenetic suppression of Sst-INs  
19 with Arch also enabled LTP of the dmPFC-BLA synapses both *ex vivo* and *in vivo*. These findings reveal that Sst-INs  
20 but not PV-INs gate LTP in the dmPFC-BLA pathway and provide a method for artificial synaptic facilitation in BLA.  
21

22 **Keywords:** long-term potentiation, disinhibition, amygdala, somatostatin interneurons.  
23

24 \* Wataru Ito, E-mail: [wataru.ito@gmail.com](mailto:wataru.ito@gmail.com), Alexei Morozov, E-mail: [alexeim@vtc.vt.edu](mailto:alexeim@vtc.vt.edu)  
25

## 26 **1 Introduction**

27 Circuit interrogation using the optogenetics and chemogenetics has become a standard approach  
28 for testing the causal role of specific neuronal populations and synapses in brain activities and  
29 animal behaviors. The techniques employ depolarizing or hyperpolarizing neuronal compartments,  
30 like the soma, dendrites, and synaptic terminals, to trigger or suppress the action potentials and  
31 release of neurotransmitter (1, 2). Meanwhile, the natural neuronal adaptations driven by  
32 experience and learning, or observed during development or in disease, involve brain alterations,  
33 not only in the neuronal activity but also in the synaptic efficacy. For example, the auditory fear

34 conditioning, a model of adaptive defensive behavior, strengthens the auditory inputs to the lateral  
35 amygdala (3), whereas the fear extinction training depresses the prefrontal-amygdala synapses and  
36 strengthens the reciprocal amygdala-prefrontal synapses (4, 5). Modeling and quantitative analyses  
37 of such naturally occurring brain adaptations require methods for selective manipulation of the  
38 synaptic strength both *ex vivo* and *in vivo*.

39 By applying high- or low-frequency presynaptic stimulation, synapses, in many cases, can  
40 be potentiated or depressed, respectively (6). This simple technique has been employed in  
41 optogenetics for manipulating synaptic strength *ex vivo* and *in vivo* and proved successful in  
42 several cases. LTP was obtained in the recurrent synapses in hippocampal area CA3 by applying  
43 20 Hz stimulation (7) and in the cortico-striatal synapses by applying the theta-burst stimulation  
44 (8). LTD was obtained in the inputs to the nucleus accumbens from the infralimbic cortex and  
45 basolateral amygdala by applying the low-frequency presynaptic stimulation (9, 10). At the same  
46 time, some synapses do not follow the frequency rule—the high-frequency stimulation generated  
47 LTD in the inputs from BLA to the dorsomedial prefrontal cortex (dmPFC) (11).

48 The synaptic strength in the BLA afferents has been recognized as a critical determinant of  
49 fear behaviors and readily changes by emotional experiences. For example, the auditory fear  
50 conditioning, in which the animal experiences a neutral conditioned stimulus (CS) followed by  
51 electrical footshocks as the unconditioned stimulus (US), facilitates the remote inputs to the lateral  
52 subdivision of BLA (3, 12, 13). However, an artificial LTP induction in the BLA afferents, by  
53 solely presynaptic stimulation, was predicted to be ineffective because the local GABAergic  
54 neurons provide potent feedforward inhibition and gate plasticity in the remote glutamatergic  
55 inputs (14, 15). Therefore, the robustness of the “natural” behavior-driven plasticity is explained

56 by the US actions to disinhibit the BLA by attenuating GABAergic transmission via multiple  
57 mechanisms, including the secretion of neuromodulators (15-17).

58 Here, to achieve reliable artificial LTP inductions in the BLA input from dmPFC, which is  
59 the critical circuit for emotional learning and control of mood, we tested the effects of  
60 chemogenetic/optogenetic suppression of GABAergic transmission during the LTP induction by  
61 high-frequency stimulation. The two major classes of GABAergic neurons—the parvalbumin-  
62 positive (PV-INs) and somatostatin-positive interneurons (Sst-INs) (18)—were suppressed  
63 individually, which revealed that the Sst-INs gate the artificially-induced LTP.

64

## 65 **2 Materials and methods**

### 66 *2.1 Animals*

67 All mice were either wildtype or transgenic males on the 129SvEv/C57BL/6N F1 hybrid  
68 background. To obtain the mice expressing hM4Di (19) in Sst-INs or PV-INs, homozygous R26-  
69 LSL-Gi-DREADD males (JAX Stock No: 026219) on C57BL/6N background were crossed with  
70 homozygous interneuron-specific Cre driver females on 129SvEv background—either the Sst-IN-  
71 specific Cre driver (Sst-Cre), *Sst<sup>tm2.1(cre)Zjh</sup>* (20) (JAX: 013044) or the PV-IN-specific Cre driver  
72 (PV-Cre), *Pvalb<sup>tm1(cre)Arbr</sup>* (21) (JAX: 008069). To obtain heterozygous Sst-Cre mice, wild type  
73 C57BL/6N males were crossed with the 129SvEv homozygous *Sst<sup>tm2.1(cre)Zjh</sup>* females. All breedings  
74 were the trios of one male and two females on the C57BL/6N and 129SvEv backgrounds,  
75 respectively. Male pups were weaned at p21-p25 and housed 3-5 littermates per cage. All  
76 experiments were approved by Virginia Tech IACUC and followed the NIH Guide for the Care  
77 and Use of Laboratory Animals.

### 78 *2.2 Surgery—Viral Injection and Optrode Implantation*

79 AAVs for expressing Chronos or Cre-activated Arch were generated from pAAV-Syn-Chronos-  
80 GFP (22) (Addgene #59170) or pAAV-FLEX-Arch-GFP (Addgene #22222), respectively, gifts  
81 from Edward Boyden. The viruses (pseudotype 5 for Chronos and pseudotype 1 for Arch) were  
82 prepared by the University of North Carolina Vector Core (Chapel Hill, NC). At p28, the  
83 heterozygous Sst-Cre male mice were anesthetized by intramuscular injection of  
84 Ketamine/Xylazine/Acepromazine, 100/5.4/1 mg/kg, placed in a stereotaxic apparatus (David  
85 Kopf, Tujunga, CA), and underwent minimum craniotomy (~0.5 mm diameters). For the dmPFC  
86 virus injection, the dura mater was preserved. A heater-pulled short-taper glass pipette (shaft:  
87 0.6/0.4 mm external/internal diameter, beveled tip: 50  $\mu$ m, diameter, Drummond, Broomall, PA)  
88 filled with the virus solution ( $10^{12}$  viral particles/ml) was slowly lowered to the target (1.3 mm  
89 anterior, 0.4 mm lateral from bregma, and 1.3 mm ventral from brain surface). 0.5  $\mu$ L of the  
90 solution were injected bilaterally at the rate of 0.2  $\mu$ L/min using a syringe pump connected to the  
91 pipette through plastic tubing filled with water as described (23). For the BLA virus injections, the  
92 dura mater was removed to allow straight penetration by a less rigid long-taper pipette. 0.4  $\mu$ L of  
93 the virus solution ( $10^{12}$  particles/ml) was injected bilaterally at the rate of 0.1  $\mu$ L/min at the  
94 coordinates (1.2 mm posterior, 3.2 mm lateral from bregma, and 4.2 mm ventral from brain  
95 surface). The optrodes for *in vivo* recording were fabricated and implanted in BLA at p60 as  
96 described (24). For post-operation analgesia, ketoprofen (5 mg/kg) was administered  
97 subcutaneously.

## 98 *2.3 Ex Vivo Recordings*

### 99 *2.3.1 General*

100 Mice were anesthetized with intraperitoneal injection of Avertine, 0.4 mg/kg, and intracardially  
101 perfused with ice-cold partial sucrose artificial cerebrospinal fluid (ACSF) solution containing (in

102 mM) 80 NaCl, 3.5 KCl, 4.5 MgSO<sub>4</sub>, 0.5 CaCl<sub>2</sub>, 1.25 H<sub>2</sub>PO<sub>4</sub>, 25 NaHCO<sub>3</sub>, 10 glucose, and 90  
103 sucrose equilibrated with 95 % O<sub>2</sub> / 5 % CO<sub>2</sub> (25). Amygdala slices, 300 μm thick, were prepared  
104 and stored as described earlier (24). Recording chamber was superfused at 2 ml/min with ACSF  
105 equilibrated with 95 % O<sub>2</sub> / 5 % CO<sub>2</sub> and containing (in mM) 119 NaCl, 2.5 KCl, 1 MgSO<sub>4</sub>, 2.5  
106 CaCl<sub>2</sub>, 1.25 H<sub>2</sub>PO<sub>4</sub>, 26 NaHCO<sub>3</sub>, and 10 glucose (pH 7.4), and maintained at 30 ± 1 °C. Whole-  
107 cell recordings were obtained with EPC-10 amplifier and Pulse v8.76 software (HEKA Elektronik,  
108 Lambrecht/Pfalz, Germany). Putative glutamatergic neurons in BLA were identified by their  
109 pyramidal morphology (26) under Dodt gradient contrast optics (custom made) at 850 nm LED  
110 illumination (Thorlabs, Newton, NJ). GABAergic neurons expressing hM4Di-Citrine or Arch-  
111 GFP were identified by fluorescence. The recording pipettes (3-5 MΩ) were filled with (in mM)  
112 120 K-gluconate, 5 NaCl, 1 MgCl<sub>2</sub>, 10 HEPES, 0.2 EGTA, 2 ATP-Mg and 0.1 GTP-Na for current-  
113 clamp recordings or with 120 Cs-methanesulfonate, 5 NaCl, 1 MgCl<sub>2</sub>, 10 HEPES, 0.2 EGTA, 2  
114 ATP-Mg, 0.1 GTP-Na, and 10 mM QX314 for voltage-clamp recordings. Both internal solutions  
115 were set at pH 7.3 and osmolarity 285 Osm. Membrane potentials were corrected by the junction  
116 potential of 12 mV. Series resistance (R<sub>s</sub>) was 10 – 20 MΩ and monitored throughout experiments  
117 to exclude the recording data if the R<sub>s</sub> changed more than 20%. LFP recordings were obtained  
118 using Multiclamp 700B amplifier and Digidata 1440A (Molecular Device, Sunnyvale, CA). The  
119 recording pipettes (1-2 MΩ) were filled with ACSF. Light pulses of 470 nm and 560 nm were  
120 generated using LED lamps (Thorlabs) and custom LED drivers based on MOSFET and were  
121 delivered through a 40× objective lens (Olympus, Center Valley, PA) at the irradiance of 0.5 to 5  
122 mW/mm<sup>2</sup>, calibrated by a photodiode power sensor (Thorlabs) at the tip of the lens.

### 123 2.3.2 LTP

124 In both the whole-cell and LFP recording, the strength of test pulses (1 ms duration) was adjusted  
125 to elicit responses at 30-40% of the maximum. In the whole-cell recordings, test pulses were given  
126 every 30 s. LTP was induced by six 2 sec trains of 50 Hz 1 ms pulses. The trains were given at the  
127 10 s interval (Fig.2A). In the LFP recordings, test pulses were given every 20 s. LTP was induced  
128 using the "spaced protocol." It included pairs of 1-sec trains of 50 Hz 1 ms pulses, separated by 10  
129 s. The pairs were repeated five times at the 3 min interval (Fig.3A). This protocol is the same as  
130 in a published study on LTP in BLA (27), except the stimulation frequency was decreased from  
131 100 to 50 Hz to allow reliable activation of Chronos (22). In some experiments, continuous yellow  
132 light was given during the trains of the blue light pulses. The yellow light strength was set below  
133 the levels that trigger the release of glutamate from the axonal terminals expressing Chronos (data  
134 not shown).

#### 135 *2.4 In Vivo Recordings*

136 The subject animals, bilaterally injected with the AAV-Chronos in the dmPFC, AAV-Arch in  
137 BLA, and bilaterally implanted with the optrodes in the BLA, were housed with the littermates  
138 until the experiment. Using the RHA2000-Series Amplifier USB Evaluation Board (RHA2000-  
139 EVAL, Intan Technologies), the local field potentials (LFPs) were recorded from BLA of the  
140 subject mouse in the home cage without the lid, from where the cagemates were removed  
141 temporarily for the duration of the recording. Mice were habituated to the recording environment  
142 by connecting to the recording system for 2-3 h per day during 2-3 consecutive days. fEPSPs were  
143 elicited in BLA by blue light stimulation of dmPFC terminals expressing Chronos. The strength  
144 of the test pulses (1 ms, 2-3 mW at the tip of optrode) was adjusted to obtain the fEPSP slope at  
145 30-40% of the maximum. The LED driver (PlexBright LD-1, Plexon) was analog-modulated by  
146 DAQ (Analog Shield, Digilent). The LED driving current was routed to the optrodes in either

147 hemisphere by electrical relays (Arduino 4 relays shield, Arduino). Arduino with a custom Arduino  
148 sketch controlled both the DAQ and the relays to give the light stimulation on each side every 30  
149 s, alternating the sides every 15 s. Once the baseline of evoked fEPSPs stabilized, LTP was induced  
150 by the same blue light stimulation protocol as in the LFP LTP experiments *ex vivo* (Fig.3A), except  
151 that the protocol was repeated three times every one hour. The positions of the optrodes were  
152 confirmed by histological analysis.

### 153 2.5 Data Analysis

154 Data were processed using custom scripts written in MATLAB (MathWorks) and Clampfit  
155 software (Molecular Devices). Statistical analyses were performed using GraphPad Prism 5  
156 (GraphPad Software, La Jolla, CA). Normality was tested using the Shapiro-Wilk test. Datasets  
157 with normal distribution were compared using the one-sample t-test. The datasets with non-normal  
158 distribution were analyzed using the Mann-Whitney test and the Wilcoxon Signed Rank Test. The  
159 difference was deemed significant with  $p < 0.05$ .

160

## 161 3 Results

### 162 3.1 DREADD-hM4D(Gi) Suppresses GABA Release from BLA Interneurons

163 The efficiency of DREADD suppression was tested by double-patch recording from connected  
164 pairs of an interneuron (IN) expressing hM4Di-Citrine identified by the fluorescence and a putative  
165 principal neuron (PN). The brief depolarizing current was injected in the IN to trigger single action  
166 potential (AP). It resulted in the inhibitory postsynaptic current (IPSC) in the connected PN.  
167 Including CNO (1  $\mu$ M) in the bath did not prevent APs but diminished IPSCs (Fig.1). The  
168 DREADD suppression of presynaptic GABA release despite the presence of action potential was  
169 consistent with published findings (28).

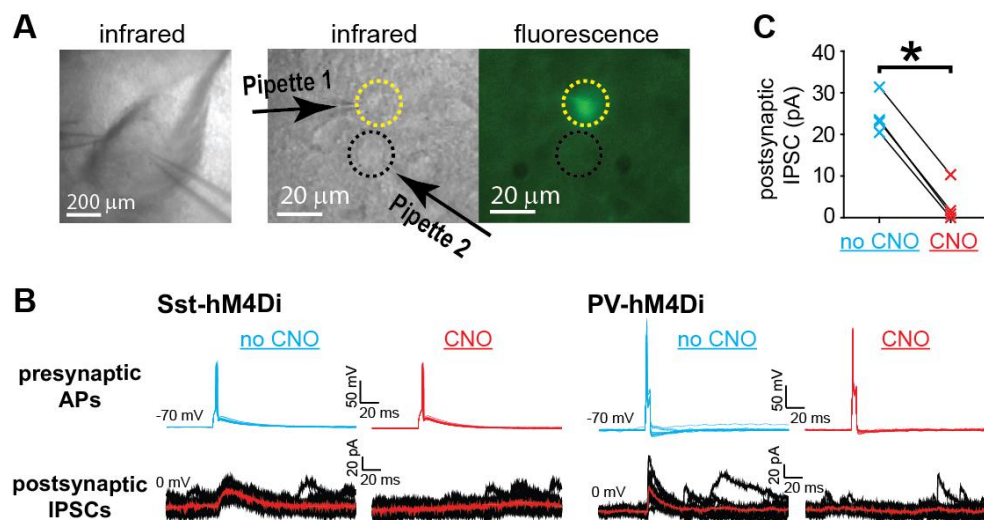

170

171 **Fig.1 DREADD suppresses GABA release from BLA interneurons during action potentials.**  
 172 (A) Example of the paired whole-cell recording from a BLA slice. Left: Infrared (IR) image at low  
 173 magnification. Right: high magnification IR and fluorescent images. Dotted yellow and black  
 174 circles indicate an Sst-IN expressing hM4D(Gi)-citrine identified by fluorescence and a putative  
 175 principal neuron (PN), respectively. (B) Examples of double patch recordings of APs evoked by  
 176 current injection in the interneurons (400 pA, every 15 s) (upper) and of the corresponding IPSCs  
 177 in the connected PNs (lower), in the absence of CNO (no CNO, blue) and after 10 min perfusion  
 178 with 1 μM CNO (CNO, red). Fifteen traces and IPSC averages (red line) are shown for a pair with  
 179 an Sst-IN (left, Sst-hM4(Di)) and a pair with a PV-IN (right, PV-hM4(Di)). (C) Summary data for  
 180 IPSC amplitudes (n=4, including three pairs with Sst-INs and one pair with PV-IN) in the absence  
 181 and presence of CNO. \*p<0.05, Mann Whitney test.

182

### 183 3.2 Chemogenetic Suppression of Sst-INs Enables LTP Induction Ex Vivo

184 For faithful activation of dmPFC axons at high-frequency, a fast opsin Chronos (22) was expressed  
 185 in dmPFC. The 50 Hz trains of light pulses were used for LTP induction (Fig.2A). First, we  
 186 examined the effect of DREADD suppression of Sst-INs on LTP, by whole-cell recording from  
 187 PNs in BLA slices expressing hM4Di in Sst-INs. In the absence of CNO, the 50 Hz stimulation of  
 188 dmPFC axons caused a brief post-tetanic potentiation of the excitatory postsynaptic currents  
 189 (EPSCs), followed by a rapid EPSC decline with a tendency towards depression at the minutes 25-  
 190 30 after the induction (p=0.068). In the presence of CNO, the stimulation caused increases in



191 EPSCs lasting for at least 30 min (Fig.2), suggesting that suppression of Sst-INs enables LTP  
192 induction.

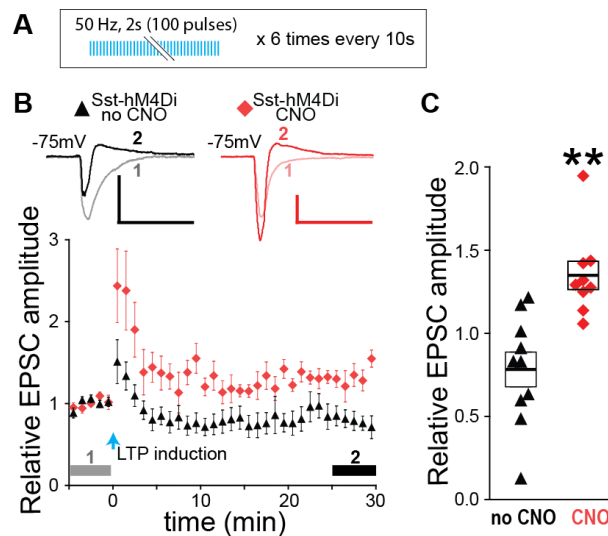

193

194 **Fig.2 DREADD suppression of Sst-INs enables facilitation of EPSCs in dmPFC-BLA**  
195 **pathway.** (A) LTP induction protocol. (B) Relative EPSC amplitudes. Symbols (black triangles:  
196 no CNO, red diamonds: CNO) represent the average amplitudes of 2 consecutive EPSCs recorded  
197 during each minute. Upper insets: examples of averaged EPSCs before (1) and after (2) LTP  
198 induction as indicated by horizontal grey and black bars, respectively. Scales: 100 pA, 50 ms. (C)  
199 Relative EPSC amplitudes averaged during (2) for each neuron. n=10 (no CNO) and 9 (CNO).  
200 \*\*p<0.01, compared to baseline, one-sample t-test. Boxes and the thick bars inside represent SEM  
201 and means.

202

203 Repeated neuronal stimulation over extended time intervals, or the spaced LTP protocols,  
204 induces LTP more effectively than the shorter protocols, which is consistent with greater efficiency  
205 of spaced over massed training (29). However, our attempts to induce LTP with a spaced protocol  
206 during the whole-cell recording have failed (data not shown), presumably because the dialysis of  
207 the intracellular content limits the time between obtaining the whole-cell configuration and  
208 effective LTP induction. To overcome this limitation, in the following experiments, LTP was  
209 tested by recording local field potentials (LFPs) and using the spaced LTP protocol (Fig.3A). We  
210 run the CNO control, and then tested the effects of suppressing PV-INs, and re-examined the effect  
211 of suppressing Sst-INs.

212 For CNO control, we recorded from slices that did not express hM4Di. There was no  
213 significant LTP in the absence or presence of CNO, but there was a tendency towards LTP with  
214 CNO ( $p=0.09$ ) (Fig.3B). In slices with hM4Di in PV-INs, there was no significant LTP in the  
215 absence or presence of CNO but a tendency towards LTP in the absence of CNO ( $p=0.09$ ) (Fig.3C).  
216 In slices expressing hM4Di in Sst-INs, there was a significant LTP in the presence of CNO and no  
217 LTP in the absence of CNO (Fig.3D). These data indicate that a) CNO in the absence of hM4Di  
218 has a minor effect if any on LTP induction, b) suppression of PV-INs does not aid LTP induction,  
219 but may rather impede it, and c) suppression of Sst-INs enables LTP.

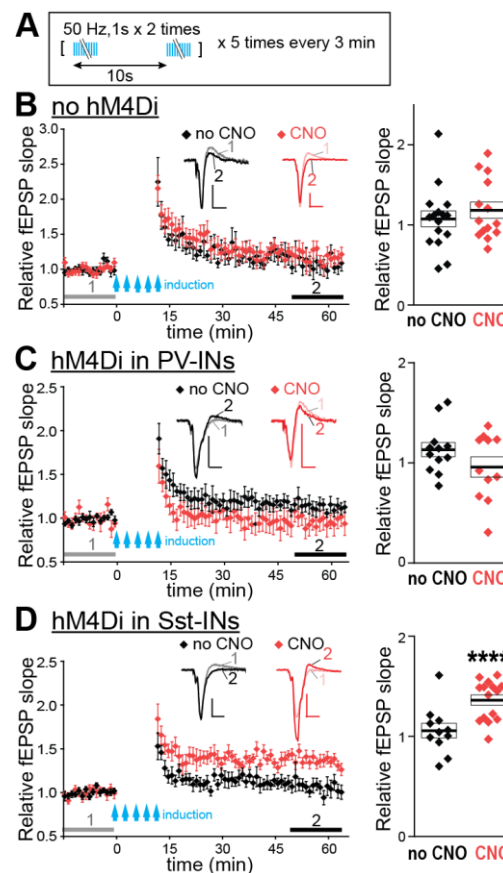

220

221 **Fig.3 DREADD suppression of Sst-INs enables facilitation of LFPs evoked in the dmPFC-**  
222 **BLA pathway.** (A) LTP induction protocol. (B-D) LTP experiments on slices without hM4Di (B),  
223 with hM4Di expressed in PV-INs (C), and with hM4Di expressed in Sst-INs (D). Left: Relative  
224 fEPSP slopes. Symbols on the diagram represent the averages of three consecutive data points  
225 obtained every 20 sec. Insets represent examples of averaged fEPSPs before (1) and after (2) LTP  
226 induction as indicated by horizontal grey and black bars. Scales: 0.1 mV, 10 ms. Right: Relative

227 fEPSP slopes averaged during (2) for each slice. n=16 (no CNO) and 14 (CNO) in (B). n=12 (no  
228 CNO) and 11 (CNO) in (C). n=11 (no CNO) and 15 (CNO) in (D). \*\*\*\*p<0.0001, compared to  
229 baseline, one-sample t-test. Boxes and the thick bars inside represent SEM and means.  
230

### 231 3.3 Arch in Sst-INs Enables LTP Induction Ex Vivo and In Vivo

232 To examine the effects of optogenetic suppression of Sst-INs, Arch was expressed in the Sst-  
233 neurons of BLA (Fig.4A). Presynaptic stimulation was given through Chronos expressed in  
234 dmPFC terminals in the same way as in the DREADD suppression experiments. Paired recordings  
235 confirmed that Arch attenuated GABAergic transmission between Sst-IN and principal neuron  
236 (PN) in BLA (Fig.S1).

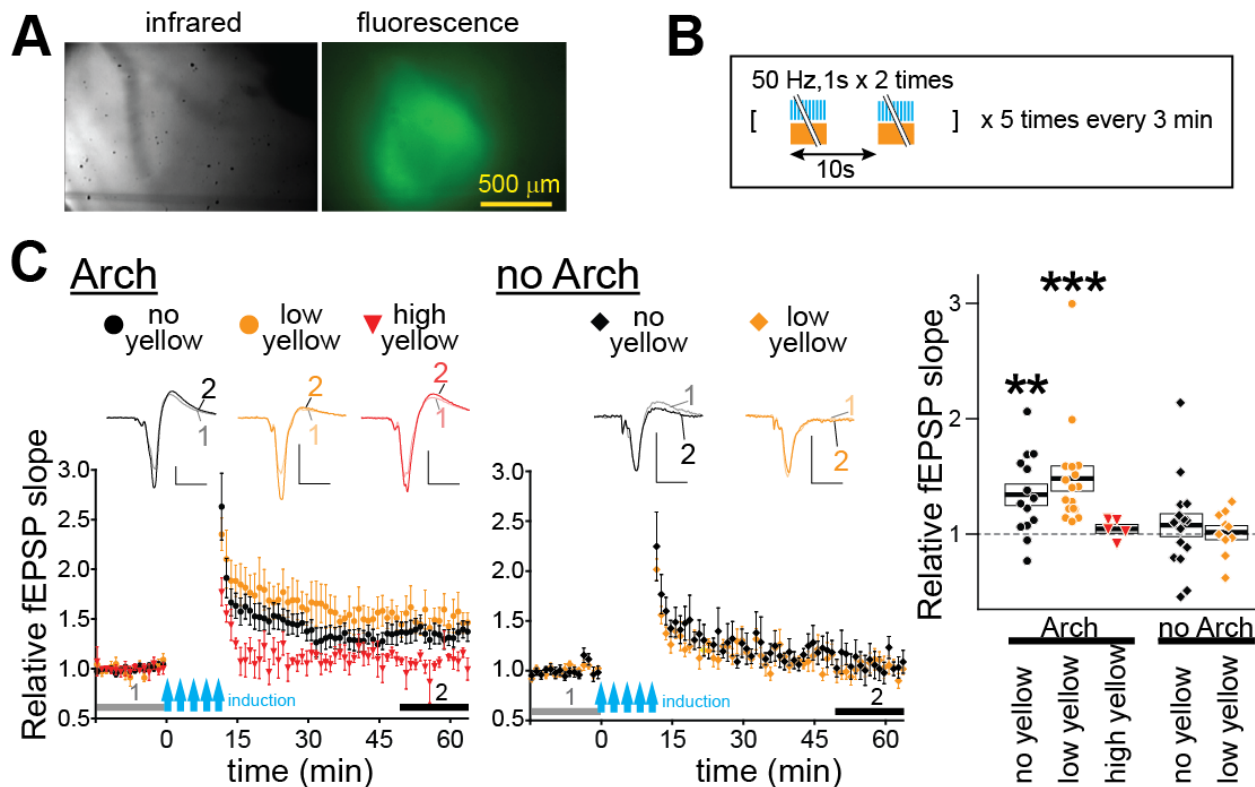

237

238 **Fig.4 Arch suppression of Sst-INs enables LTP induction.** (A) Right: Chronos-GFP and Arch-  
239 GFP fluorescence in BLA of an Sst-Cre driver mouse transduced with a Chronos-AAV in dmPFC  
240 and a floxed Arch AAV in BLA. Left: an IR image of the same slice. (B) LTP induction protocol.  
241 (C) LTP experiments on slices with Arch (left) and without Arch (middle) in Sst-INs, with LTP  
242 induced using pulses of blue light alone (black circle: no yellow) or combined with the continuous  
243 yellow light of two intensities: 0.15 mW/cm<sup>2</sup> (orange circles: low yellow) and 0.24 mW/cm<sup>2</sup> (red  
244 inverted triangles: high yellow). Insets represent examples of averaged fEPSPs before (1) and after

245 (2) LTP induction as indicated by horizontal grey and black bars. Scales: 0.2 mV, 10 ms. Right:  
246 Summary data for relative fEPSP slopes averaged during (2) for each slice. n=14 (Arch-no yellow),  
247 17 (Arch-low yellow), 5 (Arch-high yellow), 16 (no Arch-no yellow) and 10 (no Arch-low yellow).  
248 \*\*p<0.01, \*\*\*p<0.001, compared to baseline, Wilcoxon Signed Rank Test. Boxes and the thick  
249 bars inside represent SEM and means.  
250

251 LTP induction in the dmPFC-BLA input was tested by giving trains of blue light pulses  
252 alone (Fig.3A) or combined with the continuous yellow light of different intensities (Fig.4B). The  
253 yellow light by itself did not cause the release of glutamate from the dmPFC axonal terminals in  
254 BLA (data not shown). Unexpectedly, the trains of blue light in the absence of yellow light induced  
255 a significant LTP (Fig.4C, black-filled circles). Combining the trains of blue light and the yellow  
256 light of low intensity (0.15 mW/mm<sup>2</sup>) produced more significant LTP and with a tendency to be  
257 higher than with the blue light alone (Fig.4C, orange-filled circles). Increasing the yellow  
258 irradiance to 0.24 mW/mm<sup>2</sup> prevented LTP induction (Fig.4C, red-filled inverted triangles). In  
259 slices without Arch, the low-intensity yellow light did not enable LTP induction by the pulses of  
260 blue light (Fig.4C, middle). Together, these data indicate that Arch enables LTP induction by the  
261 trains of blue light and it occurs even in the absence of yellow light, suggesting that the blue light  
262 inhibits Sst-INs expressing Arch. Consistently, whole-cell recordings from an Sst-IN with Arch  
263 revealed hyperpolarizing currents elicited by blue light (Fig.S2).

264 To test LTP induction *in vivo*, mice expressing Arch in the BLA Sst-INs and Chronos in  
265 dmPFC were implanted with optrodes, whose two electrodes were positioned in BLA and an  
266 optical fiber above BLA (Fig.5AB). The LTP induction protocol, identical to the protocol used *ex*  
267 *vivo*, but repeated 3 times with the one-hour interval, produced LTP, which lasted for almost 10 h  
268 (Fig.5CD).

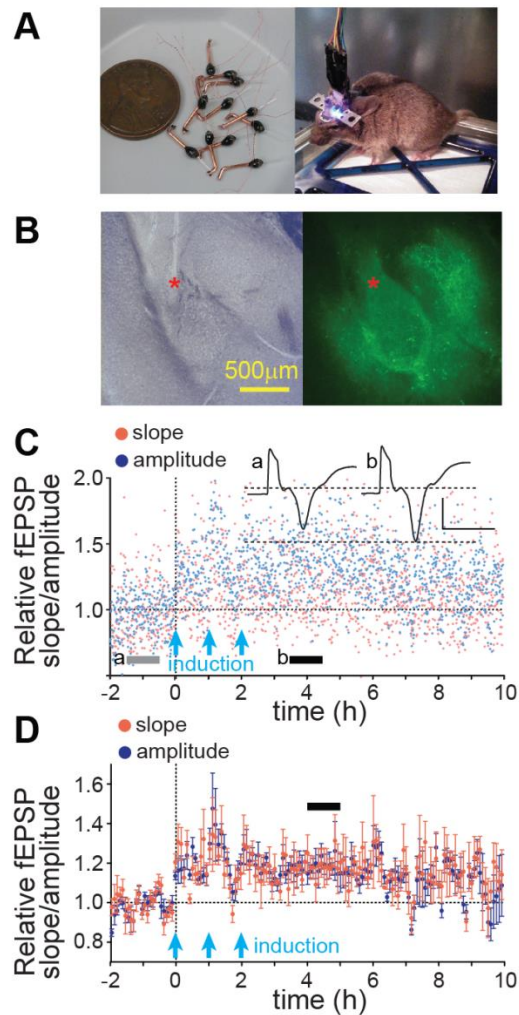

269

270 **Fig.5 Arch-assisted LTP induction *in vivo*.** (A) Left: LED light source-oprode assemblies, right:  
271 a mouse implanted with two optrodes aiming bilaterally at BLA. (B) An example position of  
272 electrodes (red asterisks) in a BLA slice imaged under the visible (left) or fluorescent (right) light.  
273 The fluorescence arises from Chronos-GFP in dmPFC axons and Arch-GFP in Sst-INs. (C) An  
274 example of an LTP experiment showing the slope (red) and amplitude (blue) of light-evoked  
275 fEPSP. Light-blue arrows show the trains of 50Hz light stimulation. The horizontal grey/black  
276 bars indicate the ranges for averaging for the sweeps shown in insets (a: grey, before LTP  
277 induction. b: black after induction). Scales: 0.4 mV, 5 ms. (D) Summary LTP data (n=6). The slope  
278 facilitation during the 3d hour after induction, identified by the horizontal bar, is highly significant  
279 ( $p < 0.0001$ ).

280

281

282

283 **4 Discussion**

284 This study has three findings: 1) Sst-INs, but not PV INs gate the plasticity in the dmPFC-BLA  
285 pathway induced by high-frequency presynaptic stimuli, 2) removal of the inhibition from Sst-INs,  
286 either chemogenetically or optogenetically, both enables the artificial facilitation of this pathway  
287 *ex vivo* and *in vivo*, and 3) blue light alone is sufficient for the optogenetically-assisted facilitation  
288 because the wavelength partially activates Arch expressed in Sst-INs.

289 The finding that suppression of Sst-INs, but not PV-INs, enables LTP induction in BLA  
290 input from dmPFC, suggests that Sst-INs are distinct groups of GABAergic neurons, specializing  
291 in gating synaptic plasticity in remote inputs to BLA. A similar role of Sst-INs was reported in the  
292 somatosensory cortex, where Sst-INs gate LTP in the lemniscal sensory pathway and their  
293 suppression by PV- and VIP-INs “opens that gate” and allows LTP induction (30). The LTP gating  
294 by Sst-INs, however, is not a universal phenomenon throughout the brain. For example, in the  
295 hippocampus, the Sst-INs located in the oriens/alveus region of the area CA1 rather enhance LTP  
296 in the Schaffer collateral pathway by inhibiting GABAergic neurons in the stratum radiatum and  
297 thereby disinhibiting the CA1 principal cells (31). The PV-INs, in turn, appear to gate the  
298 hippocampal LTP, based on the finding of a stronger LTP in the model mice for the pre-  
299 symptomatic ASL and Alzheimer, in which a mutated NRG1 receptor Erb4 causes deficiencies  
300 of the PV-INs (32-34). Thus, the PV-INs and Sst-INs oppose each other in both BLA and  
301 hippocampus, yet the roles of each IN population in LTP are reversed between the structures.  
302 Given such region-dependency of the PV- and Sst-IN functional relationship, the disinhibition-  
303 assisted LTP in different target regions may require suppressing of different subclasses of  
304 GABAergic neurons.

305 Another technical aspect is the choice between chemogenetic and optogenetic suppression.  
306 While DREADD is highly effective in suppressing GABA release from INs even when they fire  
307 action potentials, the drawbacks for *in vivo* experiments are the long washout times and the off  
308 target-effects of chemogenetic ligands (35). The optogenetic suppression of INs avoids these  
309 problems but using two different wavelengths of light *in vivo* is more expensive and technically  
310 demanding. An additional drawback of the two-light design is that stronger yellow light interferes  
311 with LTP induction. It suggests that yellow light desensitizes Chronos even at the levels that do  
312 not activate Chronos to release neurotransmitter, as seen with the ReaChR (36). Fortunately, this  
313 problem can be avoided by using blue light alone, which is sufficient for LTP induction both *ex*  
314 *vivo* and *in vivo* with Arch expressed in Sst-INs. This is because the blue light (470nm) still  
315 activates Arch, even though at the 35% efficiency of the yellow light (560nm) of the same power  
316 (37). Perhaps, the single-color disinhibition assisted LTP can be improved further by replacing  
317 Arch with a blue-shifted inhibitory opsin, like a proton pump Mac, activated by the blue 470 nm  
318 light at about 60% of the maximum efficiency (37).

319

## 320 **5 Disclosures**

321 Authors declare no conflicts of interest.

322

## 323 **6 Acknowledgments**

324 The study was supported by NIH grants MH118604 and MH120290.

325

## 326 **7 References**

- 327 1. C. K. Kim, A. Adhikari, and K. Deisseroth, "Integration of optogenetics with complementary  
328 methodologies in systems neuroscience," *Nat Rev Neurosci* **18**(4), 222-235 (2017).

- 329 2. S. M. Sternson, and B. L. Roth, "Chemogenetic tools to interrogate brain functions," *Annu Rev*  
330 *Neurosci* **37**(387-407 (2014)).
- 331 3. M. T. Rogan, U. V. Staubli, and J. E. LeDoux, "Fear conditioning induces associative long-term  
332 potentiation in the amygdala," *Nature* **390**(6660), 604-607 (1997).
- 333 4. R. M. Vouimba, and M. Maroun, "Learning-induced changes in mPFC-BLA connections after fear  
334 conditioning, extinction, and reinstatement of fear," *Neuropsychopharmacology* **36**(11), 2276-  
335 2285 (2011).
- 336 5. J. H. Cho, K. Deisseroth, and V. Y. Bolshakov, "Synaptic encoding of fear extinction in mPFC-  
337 amygdala circuits," *Neuron* **80**(6), 1491-1507 (2013).
- 338 6. T. V. Bliss, and S. F. Cooke, "Long-term potentiation and long-term depression: a clinical  
339 perspective," *Clinics (Sao Paulo)* **66 Suppl 1**(3-17 (2011)).
- 340 7. N. Oishi et al., "Artificial association of memory events by optogenetic stimulation of  
341 hippocampal CA3 cell ensembles," *Mol Brain* **12**(1), 2 (2019).
- 342 8. H. Park, A. Popescu, and M. M. Poo, "Essential role of presynaptic NMDA receptors in activity-  
343 dependent BDNF secretion and corticostriatal LTP," *Neuron* **84**(5), 1009-1022 (2014).
- 344 9. B. R. Lee et al., "Maturation of silent synapses in amygdala-accumbens projection contributes to  
345 incubation of cocaine craving," *Nat Neurosci* **16**(11), 1644-1651 (2013).
- 346 10. V. Pascoli, M. Turiault, and C. Luscher, "Reversal of cocaine-evoked synaptic potentiation resets  
347 drug-induced adaptive behaviour," *Nature* **481**(7379), 71-75 (2011).
- 348 11. O. Klavir et al., "Manipulating fear associations via optogenetic modulation of amygdala inputs  
349 to prefrontal cortex," *Nat Neurosci* **20**(6), 836-844 (2017).
- 350 12. M. G. McKernan, and P. Shinnick-Gallagher, "Fear conditioning induces a lasting potentiation of  
351 synaptic currents in vitro," *Nature* **390**(6660), 607-611 (1997).
- 352 13. E. Tsvetkov et al., "Fear conditioning occludes LTP-induced presynaptic enhancement of synaptic  
353 transmission in the cortical pathway to the lateral amygdala," *Neuron* **34**(2), 289-300 (2002).
- 354 14. H. C. Pape, and D. Pare, "Plastic synaptic networks of the amygdala for the acquisition,  
355 expression, and extinction of conditioned fear," *Physiol Rev* **90**(2), 419-463 (2010).
- 356 15. S. Krabbe, J. Grundemann, and A. Luthi, "Amygdala Inhibitory Circuits Regulate Associative Fear  
357 Conditioning," *Biol Psychiatry* **83**(10), 800-809 (2018).
- 358 16. K. Tully et al., "Norepinephrine enables the induction of associative long-term potentiation at  
359 thalamo-amygdala synapses," *Proc Natl Acad Sci U S A* **104**(35), 14146-14150 (2007).
- 360 17. S. Bissiere, Y. Humeau, and A. Luthi, "Dopamine gates LTP induction in lateral amygdala by  
361 suppressing feedforward inhibition," *Nat Neurosci* **6**(6), 587-592 (2003).
- 362 18. S. B. Wolff et al., "Amygdala interneuron subtypes control fear learning through disinhibition,"  
363 *Nature* **509**(7501), 453-458 (2014).
- 364 19. G. M. Alexander et al., "Remote control of neuronal activity in transgenic mice expressing  
365 evolved G protein-coupled receptors," *Neuron* **63**(1), 27-39 (2009).
- 366 20. H. Taniguchi et al., "A resource of Cre driver lines for genetic targeting of GABAergic neurons in  
367 cerebral cortex," *Neuron* **71**(6), 995-1013 (2011).
- 368 21. S. Hippenmeyer et al., "A developmental switch in the response of DRG neurons to ETS  
369 transcription factor signaling," *PLoS Biol* **3**(5), e159 (2005).
- 370 22. N. C. Klapoetke et al., "Independent optical excitation of distinct neural populations," *Nature*  
371 *methods* **11**(3), 338-346 (2014).
- 372 23. A. Morozov, D. Sukato, and W. Ito, "Selective suppression of plasticity in amygdala inputs from  
373 temporal association cortex by the external capsule," *J Neurosci* **31**(1), 339-345 (2011).
- 374 24. W. Ito, and A. Morozov, "Prefrontal-amygdala plasticity enabled by observational fear,"  
375 *Neuropsychopharmacology* (2019).



- 376 25. M. I. Daw et al., "Asynchronous transmitter release from cholecystokinin-containing inhibitory  
377 interneurons is widespread and target-cell independent," *J Neurosci* **29**(36), 11112-11122  
378 (2009).
- 379 26. A. J. McDonald, "Neurons of the lateral and basolateral amygdaloid nuclei: a Golgi study in the  
380 rat," *J Comp Neurol* **212**(3), 293-312 (1982).
- 381 27. Y. Y. Huang, and E. R. Kandel, "5-Hydroxytryptamine induces a protein kinase A/mitogen-  
382 activated protein kinase-mediated and macromolecular synthesis-dependent late phase of long-  
383 term potentiation in the amygdala," *J Neurosci* **27**(12), 3111-3119 (2007).
- 384 28. T. J. Stachniak, A. Ghosh, and S. M. Sternson, "Chemogenetic synaptic silencing of neural circuits  
385 localizes a hypothalamus-->midbrain pathway for feeding behavior," *Neuron* **82**(4), 797-808  
386 (2014).
- 387 29. E. A. Kramar et al., "Synaptic evidence for the efficacy of spaced learning," *Proc Natl Acad Sci U S  
388 A* **109**(13), 5121-5126 (2012).
- 389 30. L. E. Williams, and A. Holtmaat, "Higher-Order Thalamocortical Inputs Gate Synaptic Long-Term  
390 Potentiation via Disinhibition," *Neuron* **101**(1), 91-102 e104 (2019).
- 391 31. C. Vasuta et al., "Metaplastic Regulation of CA1 Schaffer Collateral Pathway Plasticity by  
392 Hebbian mGluR1a-Mediated Plasticity at Excitatory Synapses onto Somatostatin-Expressing  
393 Interneurons," *eNeuro* **2**(4), (2015).
- 394 32. Y. J. Chen et al., "ErbB4 in parvalbumin-positive interneurons is critical for neuregulin 1  
395 regulation of long-term potentiation," *P Natl Acad Sci USA* **107**(50), 21818-21823 (2010).
- 396 33. E. Quarta et al., "Deletion of the endogenous TrkB.T1 receptor isoform restores the number of  
397 hippocampal CA1 parvalbumin-positive neurons and rescues long-term potentiation in pre-  
398 symptomatic mSOD1(G93A) ALS mice," *Mol Cell Neurosci* **89**(33-41) (2018).
- 399 34. S. Huh et al., "The reemergence of long-term potentiation in aged Alzheimer's disease mouse  
400 model," *Sci Rep* **6**(29152) (2016).
- 401 35. J. L. Gomez et al., "Chemogenetics revealed: DREADD occupancy and activation via converted  
402 clozapine," *Science* **357**(6350), 503-507 (2017).
- 403 36. B. M. Hooks et al., "Dual-channel circuit mapping reveals sensorimotor convergence in the  
404 primary motor cortex," *J Neurosci* **35**(10), 4418-4426 (2015).
- 405 37. B. Y. Chow et al., "High-performance genetically targetable optical neural silencing by light-  
406 driven proton pumps," *Nature* **463**(7277), 98-102 (2010).
